# Supplementary material for: The effects of different rootstocks on aroma components, activities and genes expression of aroma-related enzymes in oriental melon fruit
Source: PeerJ. 2024 Jan 5;12:e16704. doi: 10.7717/peerj.16704 (PMC10773451; doi:10.7717/peerj.16704)
Supplement: Supplemental Information 7 — SG, self-grafted; QG, grafted on ‘Qinmi No. 1’; RG, grafted on ‘Ribenxuesong’. [file peerj-12-16704-s007.xlsx]

## Sheet: Sheet1
Table S2 Volatile compounds detected in different melon fruits. (SG: self-grafted; QG: grafted on ‘Qinmi No.1’; RG: grafted on ‘Ribenxuesong’.)
NIST name	VOC Name (IUPAC)	CAS #	Caegories	Similarity	RT(min)	SG	QG	RG
Propanoic acid, ethyl ester	Propanoic acid ethyl ester	105-37-3	Esters	730.5	4.326	12.4404	9.67108	9.87312
Isobutyl acetate	Isobutyl acetate	110-19-0	Esters	690	5.601	82.2712	78.8187	108.875
Butanoic acid, ethyl ester	Butanoic acid ethyl ester	105-54-4	Esters	676.5	6.221	36.3021	46.2321	nd*
Butanoic acid, 2-methyl-, ethyl ester	2-Methylbutanoic acid ethyl ester	7452-79-1	Esters	779.7	6.67	17.7399	11.4054	14.8778
Butanoic acid, 3-methyl-, ethyl ester	Ethyl 3-methylbutyrate	108-64-5	Esters	679	7.091	nd	0.39661	nd
Acetic acid, butyl ester	Acetic acid butyl ester	123-86-4	Esters	724.333	7.192	87.4655	84.5428	97.2414
1-Butanol, 2-methyl-, acetate	2-methyl-1-butanoacetate	624-41-9	Esters	701.083	8.538	226.032	194.015	299.394
Cyclobutanecarboxylic acid, 4-methylpentyl ester		NA	Esters	704.5	8.749	8.67904	8.80312	6.92991
1,2-Propanediol, 2-acetate	Acetic acid 2-hydroxy-1-methylethyl ester	6214-01-3	Esters	651.667	22.156	2.65124	1.88705	1.90521
Acetic acid, pentyl ester		NA	Esters	667.091	10.144	7.75809	6.27779	6.8013
2-Allylpent-4-enoic acid, benzyl ester		NA	Esters	719.583	12.788	1.93329	1.80644	1.37457
Acetic acid, hexyl ester	Acetic acid hexyl ester	88230-35-7	Esters	755.167	13.126	11.1694	17.8525	16.5088
Acetic acid diphenyl-hydroxy-1-dimethylaminoisopropyl ester		NA	Esters	605.875	13.45	7.93064	nd	nd
Ethyl 4-(ethyloxy)-2-oxobut-3-enoate		NA	Esters	633.455	14.594	4.59241	3.9153	9.14739
Acetic acid, heptyl ester	Acetic acid heptyl ester	112-06-1	Esters	642.4	15.994	0.972735	0.979098	1.19801
1-Octen-3-yl-acetate	1-Octen-3-yl-acetate	2242-10-6	Esters	817.083	16.138	16.6882	6.18688	22.5502
Acetic acid, 2-ethylhexyl ester	Acetic acid 2-ethylhexyl ester	103-09-3	Esters	638.833	16.273	0.871239	0.577953	0.520647
Ethyl (methylthio)acetate	Ethyl (methylthio)acetate	4455-13-4	Esters	709.455	17.874	51.0647	88.4354	16.4344
2-Octanol, acetate	2-Octanol acetate	2051-50-5	Esters	661.444	15.698	1.64624	1.0799	1.43657
Heptenyl angelate, 4Z-		NA	Esters	743.889	18.967	9.14852	12.1592	5.34127
Ethanol, 2,2'-[1,2-ethanediylbis(oxy)]bis-, diacetate	2,2’-Ethylenedioxydi-ethanodiacetate	111-21-7	Esters	810.75	19.03	1.97666	nd	nd
Formic acid, trans-4-methylcyclohexyl ester		NA	Esters	736.273	19.477	6.61716	3.80312	4.61623
Butanoic acid, 3-hydroxy-, ethyl ester	Ethyl 3-hydroxybutyrate	5405-41-4	Esters	661.6	19.766	nd	1.92958	nd
2,3-Butanediol, diacetate	2,3-Butanediol diacetate	1114-92-7	Esters	773.273	19.932	904.885	651.284	472.533
Isophthalic acid di(2-isopropylphenyl) ester		NA	Esters	619.778	20.282	0.176369	nd	0.116244
3-(Methylthio)propanoic acid ethyl ester	Ethyl 3-(methylthio) propionate	13327-56-5	Esters	674.714	20.932	nd	5.95432	nd
Fumaric acid, di(cis-non-3-enyl) ester		NA	Esters	678.667	21.938	nd	0.25615	nd
1,3-Butanediol, diacetate	1,3-Butylene diacetate	1117-31-3	Esters	802.583	22.294	40.4047	30.1486	29.0584
3-(Methylthio)propyl acetate	3-(Methylthio)propyl acetate	16630-55-0	Esters	768.6	22.421	3.86804	5.86124	1.95716
Diethyl 2-(N-(tert-butoxycarbonyl)amino)malonate	Diethyl 2-(N-(tert-butoxycarbonyl)amino)malonate	102831-44-7	Esters	650.571	22.52	3.14156	nd	0.68882
2-Butenoic acid, 2-methyl-, 2-methylpropyl ester, (E)-	isobutyl 2-methylcrotonate	61692-84-0	Esters	666.667	22.814	nd	nd	6.42246
Carbonic acid decyl undecyl ester		NA	Esters	662	23.445	nd	1.57874	nd
Acetic acid, phenylmethyl ester	2-Phenylacetic acid methyl	101-41-7	Esters	812.75	24.686	1.58841	1.35751	1.33983
2(3H)-Furanone, dihydro-5-pentyl-	1,4-nonanolactone	104-61-0	Esters	734	30.924	nd	3.48503	2.23808
Heptanoic acid, 3-nitrophenyl ester	Heptanoic acid 3-nitrophenyl ester	56052-18-7	Esters	629.5	25.043	nd	nd	1.22702
Glutaric acid, 2-fluorophenyl 4-methoxybenzyl ester		NA	Esters	811.375	25.404	2.55909	2.62353	2.98385
Citronellyl butyrate	Citronellyl butyrate	141-16-2	Esters	712.875	25.641	1.73598	1.77145	nd
Dimethylmalonic acid, 2-phenethyl undecyl ester		NA	Esters	716.417	26.602	0.791933	0.760622	0.81275
Propanoic acid, 2-methyl-, 3-hydroxy-2,2,4-trimethylpentyl ester	2,2,4-Trimethyl-1,3-pentadiol 1-isobutyrate	77-68-9	Esters	740.9	27.769	1.52209	1.50886	1.76588
2,2,4-Trimethyl-1,3-pentanediol diisobutyrate	2,2,4-Trimethyl-1,3-pentanediol diisobutyrate	6846-50-0	Esters	715.5	27.973	4.49814	2.81508	4.48036
Phosphoric acid, dibutyl 1,1-dimethyl-2,2,3,3-tetrafluoropropyl ester		NA	Esters	700.4	28.831	3.19773	3.0651	3.29174
2-Benzofurancarboxylic acid, 2,4,5,6,7,7a-hexahydro-4,4,7a-trimethyl-, methyl ester, cis-	2-Benzofurancarboxylic acid, 2,4,5,6,7,7a-hexahydro-4,4,7a-trimethyl-, methyl ester, cis-	77383-92-7	Esters	649.429	29.008	nd	nd	1.12712
2(3H)-Furanone, dihydro-3-hydroxy-4,4-dimethyl-, (-	DL-Pantoic acid lactone	79-50-5	Esters	710.417	30.916	19.4924	9.70212	16.6865
Butanoic acid, 3-methyl-, 3,7-dimethyl-6-octenyl ester	3,7-Dimethyl-6-octenyl 3-methylbutanoate	68922-10-1	Esters	696.571	31.014	nd	nd	0.258195
Tributyl phosphate	Tributyl phosphate	126-73-8	Esters	650.727	33.055	0.525903	0.431244	0.446061
Hexadecanoic acid, methyl ester	Hexadecanoic acid methyl ester	112-39-0	Esters	777.667	34.582	3.91385	4.25471	4.38485
Methyl hexadec-9-enoate		NA	Esters	856.8	35.06	1.40443	1.43055	1.39769
Ethyl 9-hexadecenoate	Ethyl 9-hexadecenoate	56219-10-4	Esters	684.833	35.719	nd	0.152665	nd
2-Ethylhexyl salicylate	2-Ethylhexyl salicylate	118-60-5	Esters	669.909	35.958	0.372694	nd	0.345149
2(4H)-Benzofuranone, 5,6,7,7a-tetrahydro-4,4,7a-trimethyl-, (R)-	(R)-5,6,7,7a-Tetrahydro-4,4,7a-trimethylbenzofuran-2(4H)-one	17092-92-1	Esters	906.909	36.662	8.23724	8.52077	9.62489
Acetyl eugenol	Acetyl eugenol	93-28-7	Esters	802	36.738	nd	nd	0.407646
Homosalate	Homosalate	118-56-9	Esters	709.5	38.55	0.277972	0.303123	0.224661
Phthalic acid, 6-ethyl-3-octyl isobutyl ester		NA	Esters	913.273	40.017	8.54965	8.98552	8.05916
Methyl 8,11,14-heptadecatrienoate		NA	Esters	698.273	40.389	0.343777	0.385854	0.437639
Dibutyl phthalate	Dibutyl phthalate	84-74-2	Esters	942.333	42.436	21.8595	17.066	18.5726
2-Tertbutyl cyclohexyl isopropylphosphonofluoridate		NA	Esters	785.545	42.835	7.50226	5.90063	6.23977
1,3-Dioxolane-4-methanol, 2-pentadecyl-, acetate, trans-		NA	Esters	610.5	25.352	nd	0.446381	0.752253
Subtotal						1636.8	1350.83	1222.91
3-Butene-1,2-diol, 1-(2-furanyl)-	1-(2-Furyl)-3-butene-1,2-diol	19261-13-3	Alcohols	690.375	3.072	0.0730957	nd	nd
Trimethylsilylmethanol	Trimethylsilylmethanol	3219-63-4	Alcohols	657.917	4.685	68.2692	53.5844	76.6319
Silanol, ethyldimethyl-		NA	Alcohols	707	9.556	nd	nd	0.846928
Eucalyptol	Eucalyptol	470-82-6	Alcohols	762.7	11.098	0.584293	0.444586	0.380551
1-Butanol, 2-methyl-	2-Methyl-1-butanol	137-32-6	Alcohols	722.75	11.37	62.1224	61.2514	27.2102
2-Buten-1-ol, (Z)-		NA	Alcohols	616.833	11.646	nd	nd	1.12852
1,4-Cyclohexanediol, trans-	trans-1,4-Dihydroxycyclohexane	6995-79-5	Alcohols	603.375	13.469	1.25325	nd	nd
16-Methyl-heptadecane-1,2-diol, trimethylsilyl ether		NA	Alcohols	645.167	15.007	nd	0.907859	nd
1-Hexanol	1-Hexanol	111-27-3	Alcohols	738.818	15.536	191.201	231.66	302.194
3-Hexen-1-ol, (E)-		NA	Alcohols	796.909	16.341	16.3316	19.4145	11.3249
3-Octanol	3-Octanol	20296-29-1	Alcohols	674.75	16.651	4.33075	4.63882	5.10355
1-Octen-3-ol	1-Octen-3-ol	3391-86-4	Alcohols	907.25	18.113	702.722	832.788	908.054
1-Heptanol	1-Heptanol	111-70-6	Alcohols	749.833	18.264	38.0591	47.6508	79.939
6-Hepten-1-ol, 2-methyl-	6-Hepten-1-ol, 2-methyl-	67133-86-2	Alcohols	619.4	18.456	1.86757	2.17872	1.79213
1-Hexanol, 2-ethyl-	2-Ethylhexyl alcohol	104-76-7	Alcohols	822.5	19.143	58.8005	59.3951	74.5972
Ethanol, 2-(methylthio)-	2-MethyIthioethanol	5271-38-5	Alcohols	741.333	20.006	182.83	240.694	152.773
2-Cyclohexen-1-ol, 2,4,4-trimethyl-		134736-78-0	Alcohols	648.3	20.782	nd	nd	0.90019
1-Octanol	1-Octanol	111-87-5	Alcohols	822.182	20.839	21.8876	21.4525	25.1567
Cyclohexanol, 2,6-dimethyl-	2,6-Dimethyl-1-cyclohexanol	5337-72-4	Alcohols	603	21.766	6.77213	6.33199	4.09404
5-Octen-1-ol, (Z)-	(Z)-5-Octen-1-ol	64275-73-6	Alcohols	747.917	21.84	9.98309	6.58172	10.6753
Cyclohexaneethanol	Cyclohexaneethanol	1193-81-3	Alcohols	693.667	22.222	5.06998	7.59413	2.72108
5,9-Undecadien-2-ol, 2,6,10-trimethyl-		21980-62-1	Alcohols	610.2	22.654	0.665109	0.794243	0.612875
Cyclohexanol, 1-ethynyl-	1-Ethynyl cyclohexanol,	78-27-3	Alcohols	602.167	22.859	0.196842	nd	nd
Silanediol, dimethyl-	Dimethyldihydroxysilane	1066-42-8	Alcohols	889.182	23.033	898.875	941.061	789.383
1-Nonanol	1-Nonanol	143-08-8	Alcohols	885	23.271	129.739	117.484	252.529
3-Nonen-1-ol, (Z)-	(Z)-3-nonen-1-ol	10340-23-5	Alcohols	867.833	23.798	60.4711	76.2381	56.9325
1-Propanol, 3-(methylthio)-	3-(Methylthio)-1-propanol	505-10-2	Alcohols	767	24.471	124.26	115.097	87.8514
(6Z)-Nonen-1-ol	(6Z)-Nonen-1-ol	35854-86-5	Alcohols	809.455	24.545	61.3498	97.3329	202.659
3,6-Nonadien-1-ol, (E,Z)-	(E,Z)-3,6-Nonadien-1-ol	56805-23-3	Alcohols	772.75	25.275	26.6905	42.8859	46.1973
1-Decanol	1-Decanol	112-30-1	Alcohols	763.2	25.577	4.23944	4.20126	5.56695
trans,cis-2,6-Nonadien-1-ol	trans,cis-2,6-Nonadien-1-ol	7786-44-9	Alcohols	672	25.655	nd	nd	1.56905
Benzyl alcohol	Benzyl alcohol	100-51-6	Alcohols	948.75	27.891	125.465	153.639	161.839
Epi-Inositol	Epi-Inositol	488-58-4	Alcohols	608	28.182	8.77168	5.11293	11.9922
O-(2-chloropropionyl)-O'-(4-fluorobenzoyl)-1,2-benzendiol		NA	Alcohols	736.222	28.344	1.0283	nd	0.785166
3-Buten-2-ol, 4-(2,6,6-trimethyl-2-cyclohexen-1-yl)-, (3E)-	4-(2,6,6-Trimethyl-2-cyclohexenyl)-3-buten-2-ol	25312-34-9	Alcohols	749.375	28.429	2.87178	3.02773	1.63554
Phenylethyl Alcohol	Phenylethyl Alcohol	60-12-8	Alcohols	954.583	28.628	65.4579	71.0443	79.9247
5,9-Undecadien-2-ol, 6,10-dimethyl-	6,10-Dimethyl-5,9-undecadien-2-ol	53837-34-6	Alcohols	635.333	29.608	0.36418	0.112362	0.252454
1-Tetradecanol	1-Tetradecanol	112-72-1	Alcohols	705.727	29.87	0.451378	0.376478	0.345164
3-Phenylpropanol	3-Phenylpropanol	122-97-4	Alcohols	814	31.316	0.553854	0.488602	0.650302
2,4,7,9-Tetramethyl-5-decyn-4,7-diol	2,4,7,9-Tetramethyl-5-decyn-4,7-diol	126-86-3	Alcohols	709.833	32.484	0.631698	0.600998	0.646624
(3R,3aS,6S,7R)-3,6,8,8-Tetramethyloctahydro-1H-3a,7-methanoazulen-6-ol		NA	Alcohols	672.727	32.733	0.318757	nd	0.325771
Bicyclo[3.3.1]nonan-3-ol, exo-		NA	Alcohols	625.8	37.619	nd	nd	0.364886
2-Cyclohexen-1-one, 4-(3-hydroxy-1-butenyl)-3,5,5-trimethyl-		NA	Alcohols	693	41.464	nd	0.688466	0.597757
Phytol	Phytol	102608-53-7	Alcohols	900.917	41.217	8.67044	6.74166	6.59671
Subtotal						2893.23	3233.5	3394.78
Butanal, 2-methyl-	2-Methyl-1-butanal	96-17-3	Aldehydes	683.083	3.483	8.87885	10.0874	15.3108
Heptanal, 2-methyl-	2-methylheptan-1-al	16630-91-4	Aldehydes	670.182	4.733	15.8075	16.5946	nd
Hexanal	Hexanal	66-25-1	Aldehydes	717.167	7.383	11.946	10.8798	10.352
2-Butenal, 2-methyl-	2-Methyl-2-butene-1-al	1115-11-3	Aldehydes	793.75	7.677	22.6394	27.4174	nd
2-Propanol, 1,1-dimethoxy-	1,1-Dimethoxy-2-propanol	42919-42-6	Aldehydes	611.4	9.085	0.333032	0.941115	4.43277
Heptanal	Heptanal	111-71-7	Aldehydes	718	10.43	54.5031	50.6857	42.2946
4-Heptenal	4-Heptenal	62238-34-0	Aldehydes	648.333	10.818	4.26286	nd	nd
Octanal	Octanal	124-13-0	Aldehydes	764.25	13.538	5.90715	5.79914	5.01925
2-Heptenal, (E)-		NA	Aldehydes	743.25	14.496	5.16971	4.51848	3.05394
Nonanal	Nonanal	124-19-6	Aldehydes	851.9	16.479	13.7844	14.2436	17.192
5-Ethylcyclopent-1-enecarboxaldehyde		NA	Aldehydes	665.667	17.027	nd	nd	0.903468
6-Nonenal, (Z)-	(Z)-6-Nonenal	2277-19-2	Aldehydes	851.083	17.975	36.1242	33.9528	30.2346
2,4-Heptadienal, (E,E)-	(E,E)-2,4-Heptadienal	4313-03-5	Aldehydes	691.111	19.048	nd	nd	5.01872
Decanal	Decanal	112-31-2	Aldehydes	743.083	19.251	2.75766	1.51405	2.29666
Benzaldehyde	Benzaldehyde	100-52-7	Aldehydes	940.083	19.735	41.5921	109.194	42.9991
2,6-Nonadienal, (E,E)-	(E,E)-2,6-nonadienal	17587-33-6	Aldehydes	723.091	21.373	16.2155	13.5915	26.9753
1-Cyclohexene-1-carboxaldehyde, 2,6,6-trimethyl-	2,6,6-trimethylcyclohexene-1-carbaldehyde	432-25-7	Aldehydes	818.583	22.207	7.35234	6.85402	5.89748
Benzeneacetaldehyde	Benzeneacetaldehyde	122-78-1	Aldehydes	937.273	22.626	12.7332	15.7943	18.8046
Citral	Citral	5392-40-5	Aldehydes	682.444	24.773	nd	nd	1.36148
2,3-dihydro-1H-Indene-4-carboxaldehyde	2,3-dihydro-1H-Indene-4-carboxaldehyde	51932-70-8	Aldehydes	624.778	29.993	0.491806	nd	nd
cis,cis-7,10,-Hexadecadienal		NA	Aldehydes	650	38.997	0.648689	0.649284	0.437496
Vanillin	Vanillin	121-33-5	Aldehydes	679.417	40.337	0.541245	0.917899	0.954898
Subtotal						261.689	323.635	233.539
1,3-Cyclopentanedione, 4-(3-methylbutyl)-		NA	Ketones	648.875	9.213	nd	nd	0.693711
4-Methyl-5-nonanone	4-Methyl-5-nonanone	35900-26-6	Ketones	620	9.452	0.592192	nd	nd
4-Methyl-3,5-decandione		NA	Ketones	624.182	12.548	3.53327	2.91072	4.94251
Cyclobutanone, 2,3,3,4-tetramethyl-	2,3,3,4-Tetramethylcyclobutanone	53907-62-3	Ketones	735.833	12.642	29.6649	31.8573	56.1162
Pyrrolidin-2-one, 5-[2-butyrylethyl]-		NA	Ketones	629	12.983	2.95773	4.04099	5.06578
1-Hepten-3-one	1-Hepten-3-one	2918-13-0	Ketones	701.9	14.008	nd	1.49538	2.56614
6-Octen-2-one	6-Octen-2-one	35194-31-1	Ketones	639	14.771	2.46286	2.56652	0.894567
5-Hepten-2-one, 6-methyl-	6-methyI-5-hepten-2-one	110-93-0	Ketones	788.333	14.937	4.56123	4.96233	4.77063
Isophorone	Isophorone	78-59-1	Ketones	604.6	16.682	2.66555	nd	0.927047
Acetophenone	Acetophenone	98-86-2	Ketones	909.583	22.837	6.96537	7.07954	7.83045
2H-imidazole-2-thione, 1,3-dihydro-1-methyl-5-(1-methylethyl)-	1-methyl-5-(propan-2-yl)-1H-imidazole-2-thiol	72119-98-3	Ketones	610	23.175	0.688769	1.00643	0.896747
4a,8a-(Methaniminomethano)naphthalene-9,11-dione, 10-phenyl-		69915-10-2	Ketones	604.6	24.851	0.466604	nd	nd
2-Buten-1-one, 1-(2,6,6-trimethyl-1-cyclohexen-1-yl)-	1-(2,6,6-Trimethyl-1-cyclohexenyl)-2-butene-1-one	35044-68-9	Ketones	770.889	26.668	0.96102	1.14663	0.950889
Ionone	Ionone	8013-90-9	Ketones	765.727	27.379	18.2748	15.7179	23.8483
5,9-Undecadien-2-one, 6,10-dimethyl-, (E)-	(E)-6,10-dimethyl-5,9- undecadien-2-one	3796-70-1	Ketones	796.75	27.478	1.75447	2.05061	1.90524
3-Buten-2-one, 4-(2,6,6-trimethyl-1-cyclohexen-1-yl)-	4-(2,6,6-trimethyl-1-cyclohexene-1-yl)-3-buten-2-one	14901-07-6	Ketones	920.75	29.213	67.9377	67.5397	46.7425
2-Butanone, 4-(2,6,6-trimethyl-1-cyclohexen-1-yl)-	4-(2,6,6-Trimethyl-1-cyclohexenyl)-2-butanone	17283-81-7	Ketones	816.4	29.518	1.14392	1.06891	1.00188
3-Buten-2-one, 4-(2,2,6-trimethyl-7-oxabicyclo[4.1.0]hept-1-yl)-	4-(1,2-Epoxy-2,6,6-trimethylcyclohexyl)-3-buten-2-one	23267-57-4	Ketones	836.182	30.259	32.6112	30.5342	39.6238
Amiodarone	Amiodarone	1951-25-3	Ketones	650.636	30.351	9.46751	9.12968	6.93988
2,5-cyclohexadien-1-one, 2,6-bis(1,1-dimethylethyl)-4-hydroxy-4-methyl-	2,6-Di(tert-butyl)-4-hydroxy-4-methyl-2,5-cyclohexadien-1-one	10396-80-2	Ketones	636.75	32.393	0.533765	0.516544	0.329056
Norpipanone	Norpipanone	561-48-8	Ketones	636.889	33.017	0.815531	0.426949	0.840024
1H-Pyrrole-2,5-dione, 3-ethyl-4-methyl-	3-ethyl-4-methyl-pyrrole-2,5-dione	20189-42-8	Ketones	683.75	35.402	1.52004	1.64961	1.0435
Oxacycloheptadec-8-en-2-one, (8Z)-	(8Z)-1-oxacycloheptadec-8-en-2-one	123-69-3	Ketones	751.833	36.967	nd	nd	5.01483
Subtotal						189.578	185.7	212.944
Undecane, 2,2-dimethyl-	2,2-Dimethylundecane	17312-64-0	Hydrocarbones	711.333	1.759	0.768886	0.580038	0.647993
Disiloxane, hexamethyl-	Hexamethyldisioxane	107-46-0	Hydrocarbones	948.917	1.809	6.43302	4.47461	6.00429
Heptane, 2,4-dimethyl-	2,4-Dimethylheptane	2213-23-2	Hydrocarbones	694.3	2.428	0.914288	nd	1.58126
Cyclotrisiloxane, hexamethyl-	Hexamethyl-cyclotrisiloxan	541-05-9	Hydrocarbones	983	2.775	128.396	532.052	506.006
Octane, 4-methyl-	4-Methyloctane	2216-34-4	Hydrocarbones	631.167	2.837	1.44388	nd	nd
Trisiloxane, octamethyl-	Octamethylpentanetrisiloxane	107-51-7	Hydrocarbones	885.583	2.849	5.98289	5.17413	5.79506
Silacyclopentane	Silacyclopentane	288-06-2	Hydrocarbones	652.667	3.551	7.28065	8.43249	11.0463
Heptane, 2,2,4,6,6-pentamethyl-	2,2,4,6,6-pentamethyl-heptan	13475-82-6	Hydrocarbones	841.167	4.363	18.9764	13.3221	14.046
Cyclotetrasiloxane, octamethyl-	Octamethylcyclotetraoxysilane	556-67-2	Hydrocarbones	947.417	5.444	2.12609	0.981965	2.10265
Dodecane, 2,6,10-trimethyl-	2,6,10-Trimethyldodecane,	3891-98-3	Hydrocarbones	633.333	7.468	1.2692	0.381329	nd
Undecane	Undecane	1120-21-4	Hydrocarbones	754.083	7.739	2.47521	3.29911	2.89042
Tetrasiloxane, decamethyl-	Diaminophenoxytetramethyldisiloxane	141-62-8	Hydrocarbones	904.167	7.847	5.47169	5.45821	5.98404
Cyclobutane, 1,2,3,4-tetramethyl-		69531-57-3	Hydrocarbones	724.5	9.604	28.8978	22.3787	31.6001
Hexane, 3,4-bis(1,1-dimethylethyl)-2,2,5,5-tetramethyl-	3,4-Bis(1,1-dimethylethyl)-2,2,5,5-tetramethylhexane	62850-21-9	Hydrocarbones	817.083	9.998	8.97963	8.55962	13.7503
Cyclopentasiloxane, decamethyl-	Decamethylclopentasiloxane	541-02-6	Hydrocarbones	966.333	10.317	88.3438	85.1776	56.0029
Dodecane	Dodecane	112-40-3	Hydrocarbones	780.182	10.824	10.0435	10.0704	12.6913
Cyclobutane, 1,1,2,3,3-pentamethyl-	1,1,2,3,3-Pentamethylcyclobutane	57905-86-9	Hydrocarbones	757.417	11.406	119.114	137.628	136.129
2-Octene, 2,6-dimethyl-	2,6-Dimethyl-2-octene	4057-42-5	Hydrocarbones	724.833	12.202	8.47129	8.43321	16.1323
Undecane, 3-methyl-	3-Methylundecane	1002-43-3	Hydrocarbones	636.25	9.755	0.570937	0.655656	0.755297
Cyclopentane, nonyl-	nonylcyclopentane	2882-98-6	Hydrocarbones	625.4	13.326	nd	0.299344	nd
Trisiloxane, 1,1,1,5,5,5-hexamethyl-3,3-bis[(trimethylsilyl)oxy]-	1,1,1,5,5,5-hexamethyl-3,3-bis-(trimethylsilanyloxy)-trisiloxane	3555-47-3	Hydrocarbones	859.333	13.739	1.14506	1.22392	1.39652
2,6-Octadiene, 4,5-dimethyl-	4,5-Dimethyl-2,6-octadiene.	18476-57-8	Hydrocarbones	637.222	13.748	nd	6.30846	9.85016
Tridecane	Tridecane	629-50-5	Hydrocarbones	720.455	13.877	4.00859	3.84526	5.19878
Cyclohexanone, 2,2,6-trimethyl-	1,1,3-Trimethyl-2-cyclohexanone	2408-37-9	Hydrocarbones	783.583	14.253	3.48419	3.30718	3.40509
Cyclohexasiloxane, dodecamethyl-	Dodecamethyl-cyclohexasiloxan	540-97-6	Hydrocarbones	785.25	15.289	35.4072	34.4564	35.9996
Silane, cyclohexyldimethoxymethyl-	Cyclohexylmethyldimethoxysilan	17865-32-6	Hydrocarbones	601.875	15.407	0.729705	1.01083	nd
1,6-Dioxaspiro[4.4]nonane, 2-ethyl-	2-Ethyl-1,6-Dioxaspiro[4.4]nonane	38401-84-2	Hydrocarbones	756.222	15.448	2.89968	1.80313	2.7533
Bicyclo[2.2.1]heptane, 2,2,3-trimethyl-	2,2,3-Trimethylbicyclo[2.2.1]heptane	473-19-8	Hydrocarbones	656	15.797	0.880189	0.502622	1.51297
Tetradecane	Tetradecane	629-59-4	Hydrocarbones	792.364	16.696	3.49612	3.59689	3.73277
Hexadecane	Hexadecane	629-73-2	Hydrocarbones	709.091	16.785	0.832023	nd	1.00212
Cyclohexylmethylsilane		NA	Hydrocarbones	818.333	16.848	2.65882	3.15694	2.10895
2-Methyladamantane	2-Methyladamantane	700-56-1	Hydrocarbones	628.857	17.011	0.617254	nd	0.405851
Cyclopentane, 1-methyl-2-methylene-	1-Methyl-2-methylenecyclopentane	41158-41-2	Hydrocarbones	628.6	18.244	1.17514	nd	nd
Pentadecane	Pentadecane	629-62-9	Hydrocarbones	697.833	19.324	1.92584	2.19107	2.15789
Phenyl-pentamethyl-disiloxane		NA	Hydrocarbones	687.5	19.619	92.197	86.3066	81.1445
Silane, dimethyl(dimethyl(dimethyl(2-isopropylphenoxy)silyloxy)silyloxy)(2-isopropylphenoxy)-		NA	Hydrocarbones	664	21.286	3.58761	3.09449	2.86302
Megastigma-4,6(Z),8(E)-triene		NA	Hydrocarbones	622.714	22.245	1.4021	1.06878	nd
2-Methylbicyclo[3.2.1]octane		NA	Hydrocarbones	716.4	22.479	1.0169	1.1006	2.1229
Ethylbenzene	Ethylbenzene	100-41-4	Hydrocarbones	886.417	8.479	3.91887	2.52216	4.37952
1-Hexadecyne	1-Hexadecyne	629-74-3	Hydrocarbones	666.25	23.223	nd	0.399342	nd
Cyclooctasiloxane, hexadecamethyl-		NA	Hydrocarbones	792.333	23.596	2.58487	1.74604	2.44318
1-Cyclohexyldimethylsilyloxyoctadecane		NA	Hydrocarbones	665.4	23.638	4.12769	3.92205	3.48365
Farnesene	Farnesene	502-61-4	Hydrocarbones	776.917	25.185	2.35639	2.04463	1.38058
Heptasiloxane, hexadecamethyl-	Hexadecamethyltridecaneheptasiloxane	541-01-5	Hydrocarbones	777.417	27.114	1.51579	1.11312	1.31823
Neophytadiene	Neophytadiene	504-96-1	Hydrocarbones	670.2	29.584	1.23395	1.59576	0.555633
Bicyclo[5.3.0]decane (cis)	cis-Bicyclo(5.3.0)decane	16189-46-1	Hydrocarbones	648.333	30.628	0.819029	0.882103	0.892687
Tricyclo[4.3.1.0(2,5)]decane	Tricyclo[4.3.1.0(2,5)]decane	42210-02-6	Hydrocarbones	708	37.679	nd	nd	0.819453
Subtotal						619.98	1014.56	994.093
Phenol, 2-ethyl-	2-Ethylphenol	90-00-6	Phenolics	738.25	26.568	1.34976	3.08477	3.20057
Butylated Hydroxytoluene	Butylated Hydroxytoluene	128-37-0	Phenolics	642.545	28.662	0.796205	0.740574	0.76379
2-Methoxy-5-methylphenol	2-Methoxy-5-methylphenol	1195-09-1	Phenolics	867.5	29.478	nd	nd	5.68322
Methyleugenol	Methyleugenol	93-15-2	Phenolics	903.111	30.657	2.13007	1.17148	2.00034
Eugenol	Eugenol	97-53-0	Phenolics	918.636	33.55	17.6954	9.31327	29.7505
Phenol, 2-methyl-5-(1-methylethyl)-	2-Methyl-5-(1-methylethyl)-pheno	499-75-2	Phenolics	858	34.431	1.4196	2.16333	1.97613
2,4-Di-tert-butylphenol	2,4-Di-tert-butylphenol	96-76-4	Phenolics	780.333	36.215	2.45977	1.38941	1.81143
Phenol, 4-(2-propenyl)-	4-(Prop-2-enyl)-phenol	501-92-8	Phenolics	813	36.586	2.70772	2.1859	2.50029
Phenol, 2,6-dimethoxy-4-(2-propenyl)-	2,6-Dimethoxy-4-prop-2-enylphenol	6627-88-9	Phenolics	860.429	39.957	0.284514	nd	0.26357
1,2-Benzenediol, 3,5-bis(1,1-dimethylethyl)-	3,5-Bis(1,1-dimethylethyl)-2-benzenediol	1020-31-1	Phenolics	758.571	44.947	nd	1.27352	nd
Subtotal						28.8431	21.3223	47.9499
3,3-Dimethylbutyl propylphosphonofluoridate		NA	Acids	635.167	20.259	nd	0.0868738	nd
Phosphonoacetic Acid, 3TMS derivative		NA	Acids	631.818	21.445	4.49723	4.61915	3.94527
3-Octenoic acid, TMS derivative		NA	Acids	641.1	21.722	17.4256	nd	21.7331
Octanoic acid	Octanoic acid	124-07-2	Acids	674.667	32.582	nd	nd	2.20872
9,12-Octadecadienoic acid (Z,Z)-	(Z,Z)-Octadeca-9, 12-dienoic acid	60-33-3	Acids	762.875	36.126	nd	0.504656	0.598192
(2E,6E,10E)-3,7,11,15-Tetramethylhexadeca-2,6,10,14-tetraen-1-yl formate		NA	Acids	664.833	37	1.53267	0.984703	0.553356
n-Hexadecanoic acid	n-Hexadecanoic acid	57-10-3	Acids	736.111	46.734	nd	1.1217	2.29388
Palmitoleic acid	Palmitoleic acid	373-49-9	Acids	803.5	47.383	1.13003	nd	1.05946
Subtotal						24.5855	7.31708	32.392
Dothiepin	Dothiepin	113-53-1	Nitrogen compounds	837.545	2.306	27.5201	nd	46.5363
N,N Dimethyl-3,4-methylenedioxyamphetamine	N,N Dimethyl-3,4-methylenedioxyamphetamine	131206-60-5	Nitrogen compounds	813.636	2.445	3.77246	4.72961	6.67921
(2-Hydroxyethyl)trimethylammonium bromide	(2-Hydroxyethyl)trimethylammonium bromide	1927-06-6	Nitrogen compounds	787.625	2.461	nd	8.24419	nd
Aminoacetonitrile	Aminoacetonitrile	540-61-4	Nitrogen compounds	624.8	2.701	nd	0.524643	nd
Benzimidazol-2-amine, 1-(2-diethylaminoethyl)-	1-(2-diethylaminoethyl)-2-benzimidazolamine	38652-79-8	Nitrogen compounds	723.083	4.713	11.0694	10.5901	15.8922
Pyrrolidine, 2-butyl-1-methyl-	2-Butyl-1-methylpyrrolidine	3447-03-8	Nitrogen compounds	633.167	10.85	nd	4.80008	nd
Tolycaine	Tolycaine	3686-58-6	Nitrogen compounds	794.556	13.357	3.64996	5.17843	3.83236
Semustine	Semustine	13909-09-6	Nitrogen compounds	671.6	16.057	nd	3.13938	3.93895
Acetamide, N-hexyl-	N-Hexylacetamide	7501-79-3	Nitrogen compounds	617.889	30.86	0.832547	0.701375	0.773065
5H-Tetrazol-5-amine	5H-Tetrazol-5-amine	473826-99-2	Nitrogen compounds	649.545	32.789	2.36568	2.22087	3.8721
quinoline, 7-chloro-	7-Chloro-4-nitroquinoline	612-61-3	Nitrogen compounds	813.364	33.324	3.74092	6.35059	3.71916
Caprolactam	Caprolactam	105-60-2	Nitrogen compounds	708	33.929	nd	0.303619	0.411772
1,2-Benzenedicarbonitrile	1,2-Benzenedicarbonitrile	91-15-6	Nitrogen compounds	625.091	35.895	0.47513	0.268275	nd
Acetamide, N-(phenylmethyl)-	N-(phenylmethyl)-acetamid	588-46-5	Nitrogen compounds	614.571	40.166	nd	nd	0.216256
Subtotal						53.4262	47.0511	85.8714
Carbon disulfide	Carbon disulfide	75-15-0	Sulfur compounds	745.364	2.045	1.1352	1.40181	nd
Thiophene, 2-(1,1-dimethylethoxy)-	2-(1,1-Dimethylethoxy)thiophene	23290-55-3	Sulfur compounds	685.273	6.816	2.2132	2.14183	nd
Methanesulfonic anhydride	Methanesulfonic anhydride	7143-01-3	Sulfur compounds	753.091	10.989	4.88403	4.3163	4.61945
Subtotal						8.23243	7.85994	4.61945
1,3-Dioxolane, 2-pentadecyl-	2-Pentadecyl-1,3-dioxolane	4360-57-0	Others	745.7	1.911	nd	0.512363	nd
2-Pentoxy-tetrahydropyran		NA	Others	657.5	2.367	nd	nd	0.0634593
Indole, 3-methyl-2-(2-dimethylaminopropyl)-		NA	Others	784.818	2.999	13.0291	18.9381	nd
Trifluoromethyldifluorophosphine		NA	Others	642.571	3.276	0.186141	nd	nd
Benzene	Benzene	71-43-2	Others	820.333	3.948	1.38584	nd	1.75664
Furan, 2-ethyl-	2-Ethylfurane	3208-16-0	Others	835.917	4.216	1.24149	1.35169	2.28847
Allyl fluoride	Allyl fluoride	818-92-8	Others	650.2	6.379	5.41314	7.71891	15.9692
Benzene, 1,3-dimethyl-	1,3-Dimethyl-benzene	108-38-3	Others	895	8.901	4.58115	3.03435	5.04864
o-Xylene	o-Xylene	95-47-6	Others	875.917	10.243	2.982	1.81123	3.28771
1,3-bis[(2Z)-Hex-2-en-1-yloxy]-1,1,3,3-tetramethyldisiloxane		NA	Others	687.167	11.464	23.9486	21.3622	22.0053
Furan, 2-pentyl-	2-pentylfurane	3777-69-3	Others	904.8	11.821	5.76281	7.03941	13.8385
Styrene	Styrene	100-42-5	Others	868.9	12.501	nd	2.1393	5.65493
2,4,4,6-Tetramethyl-6-phenylheptane		NA	Others	652.143	12.896	0.572199	nd	nd
2,2'-Trimethylenebis-1,3-dioxolane	2,2'-Trimethylenebis-1,3-dioxolane	6543-04-0	Others	719.9	14.679	1.30755	1.53716	4.55909
Disiloxane, 1,3-diethyl-1,1,3,3,-tetramethyl-	1,3-Diethyl-1,1,3,3-Tetramethyl Disiloxane	2295-17-2	Others	636.5	14.916	1.15331	0.939485	1.04821
1-Triethylsilyloxyheptadecane		NA	Others	701.778	15.3	2.45403	1.57343	2.45106
1,3-Dioxolane, 2-methyl-2-(5-phenyl-3-pentenyl)-	2-Methyl-2-(5-phenyl-3-pentenyl)-1,3-dioxolane	55282-92-3	Others	631.8	16.174	nd	13.0851	8.36702
Furan, 3-(4-methyl-3-pentenyl)-		NA	Others	771.857	17.158	1.74817	1.93063	0.918129
Megastigma-7(E),9,13-triene		NA	Others	619.875	17.955	0.571051	0.579131	0.602234
Bis(N-methoxy-N-methylamino)methane		NA	Others	710.833	19.082	366.523	732.267	326.578
Butyl aldoxime, 2-methyl-, syn-		NA	Others	610.2	19.178	nd	0.970289	nd
3-Isopropoxy-1,1,1,7,7,7-hexamethyl-3,5,5-tris(trimethylsiloxy)tetrasiloxane		NA	Others	723.75	19.651	9.44505	9.22288	9.12671
Methyl-methoxy-hydroxymethyl-amine		NA	Others	634.182	21.116	20.7404	13.7833	14.4726
Hexa-1,3,5-triyne		NA	Others	729.818	22.546	5.41252	4.00496	4.72005
Oxime-, methoxy-phenyl-_		NA	Others	803.75	25.69	3.10224	2.24625	1.98099
1,4-Benzenediol, 2,3,5-trimethyl-	2,3,5-Trimethyl-4-benzenediol	700-13-0	Others	707	26.402	1.40153	1.25349	1.84396
2-Propenenitrile, 3-phenyl-, (E)-		NA	Others	703.875	27.682	0.388711	0.794123	nd
Phosphonic acid, (p-hydroxyphenyl)-		NA	Others	720.75	30.46	2.18371	2.14872	2.49598
3-Methyl-2-(3,7,11-trimethyldodecyl) furan	3-Methyl-2-(3,7,11-trimethyldodecyl) furan	166773-55-3	Others	707.429	32.559	nd	0.640336	nd
Benzene, 1,2-dimethoxy-4-(1-propenyl)-	1,2-Dimethoxy-4-(1-propenyl)-benzen	93-16-3	Others	758	33.842	nd	nd	0.180401
Methyl 2,3,4,6,7-penta-O-methyl-L-glycero-D-mannoheptopyranoside		NA	Others	618.857	35.263	0.561356	0.976916	nd
3-Butylisobenzofuran-1(3H)-one	3-Butylisobenzofuran-1(3H)-one	6066-49-5	Others	826.833	39.699	0.597341	nd	nd
Subtotal						476.693	851.861	449.257
*nd Undetected compound
