# Supplementary material for: The effects of different rootstocks on aroma components, activities and genes expression of aroma-related enzymes in oriental melon fruit
Source: PeerJ. 2024 Jan 5;12:e16704. doi: 10.7717/peerj.16704 (PMC10773451; doi:10.7717/peerj.16704)
Supplement: Supplemental Information 8 [file peerj-12-16704-s008.xlsx]

## Sheet: General List
Obs ID (Primary)	PC[1]	PC[2]	PC[3]	PC[4]	PC[5]	PC[6]	PC[7]	PC[8]	PC[9]	PC[10]	PC[11]
SG-1	7.48432	6.8529	11.2957	-7.44982	-3.74853	2.6622	-4.82455	16.1321	4.83475	2.48336	1.33689
SG-2	12.7593	-2.04502	-4.45978	-6.34614	-3.02122	-12.7	8.93149	-3.963	12.4877	0.890633	1.23891
SG-3	7.76595	-11.1998	3.13306	2.70295	-19.0954	-2.02504	-6.42593	-3.59936	-5.47448	-3.69057	-3.39877
QG-1	12.8788	-10.2859	5.57983	4.87063	1.82884	11.1798	15.6126	1.06007	-3.23118	1.21715	1.99222
QG-2	8.73977	-18.9906	-9.63075	-0.0434575	12.5001	-1.2655	-9.77229	4.29465	-0.144041	1.17911	0.549882
QG-3	8.42875	6.49435	6.94721	-6.03329	4.8623	7.96894	-7.46836	-13.1208	3.21592	-4.87264	6.52617
RG-1	8.77323	8.69943	1.64644	-10.7484	6.47173	-5.57175	2.60305	-2.33998	-12.5264	2.68697	-8.74643
RG-2	5.19031	13.3211	-21.7749	2.32394	-5.94995	7.84855	-0.0342117	1.99219	-0.781677	0.92505	0.888883
RG-3	7.499	10.2242	5.71083	21.6809	5.29485	-6.98889	-2.02667	0.336932	0.970973	-1.01447	-1.276
