# Supplementary material for: The effects of different rootstocks on aroma components, activities and genes expression of aroma-related enzymes in oriental melon fruit
Source: PeerJ. 2024 Jan 5;12:e16704. doi: 10.7717/peerj.16704 (PMC10773451; doi:10.7717/peerj.16704)
Supplement: Supplemental Information 9 — SG, self-grafted; QG, grafted on ‘Qinmi No. 1’; RG, grafted on ‘Ribenxuesong’. [file peerj-12-16704-s009.xlsx]

## Sheet: ADH
Date	Type of rootstock	Repeat	weight	0 min	3 min	Absorbance difference	Activity（U/g*min)	Average	Standard deviation	p < 0.05
The end of the fruit expansion period (30DAP)	SG	1	1.1	0.469	0.459	0.01	0.909091	0.859951	0.0694945	a
		2	1.11	0.488	0.479	0.009	0.810811
	QG	1	1.15	0.129	0.122	0.007	0.608696	0.688963	0.113515	b
		2	1.04	0.105	0.097	0.008	0.769231
	RG	1	1.12	0.393	0.387	0.006	0.535714	0.497215	0.0544463	c
		2	1.09	0.103	0.098	0.005	0.458716
The commercial ripening period (42DAP)	SG	1	0.94	0.082	0.079	0.003	0.319149	0.31109	0.0113976	a
		2	0.99	0.095	0.092	0.003	0.30303
	QG	1	1.07	0.254	0.249	0.005	0.46729	0.393219	0.104751	a
		2	0.94	0.118	0.115	0.003	0.319149
	RG	1	1	0.166	0.163	0.003	0.3	0.301515	0.00214275	a
		2	0.99	0.171	0.168	0.003	0.30303
SG: self-grafted; QG: grafted on ‘Qinmi No.1’; RG: grafted on ‘Ribenxuesong’.

## Sheet: AAT
Date	Type of rootstock	Repeat	weight	0 min	3 min	Absorbance difference	Activity（U/g*min)	Average	Standard deviation	p < 0.05
The end of the fruit expansion period (30DAP)	SG	1	0.93	0.13	0.128	0.002	0.806452	0.63281	0.162703	a
		2	3.1	0.389	0.385	0.004	0.483871
		3	1.85	0.172	0.169	0.003	0.608108
	QG	1	3	0.181	0.176	0.005	0.625	0.414438	0.190443	b
		2	3.09	0.174	0.171	0.003	0.364078
		3	2.95	0.197	0.195	0.002	0.254237
	RG	1	1.66	0.199	0.196	0.003	0.677711	0.517483	0.13951	a
		2	1.66	0.198	0.196	0.002	0.451807
		3	2.66	0.189	0.186	0.003	0.422932
The commercial ripening period (42DAP)	SG	1	3.06	0.584	0.554	0.03	3.67647	3.49922	0.218126	a
		2	3.11	0.484	0.457	0.027	3.25563
		3	3.05	0.621	0.592	0.029	3.56557
	QG	1	3.19	0.542	0.511	0.031	3.6442	3.37077	0.238312	a
		2	2.99	0.606	0.58	0.026	3.26087
		3	3.04	0.589	0.563	0.026	3.20724
	RG	1	3.01	0.504	0.483	0.021	2.61628	2.49113	0.111162	c
		2	3.12	0.582	0.562	0.02	2.40385
		3	3.21	0.591	0.57	0.021	2.45327
SG: self-grafted; QG: grafted on ‘Qinmi No.1’; RG: grafted on ‘Ribenxuesong’.
