# Supplementary material for: The effects of different rootstocks on aroma components, activities and genes expression of aroma-related enzymes in oriental melon fruit
Source: PeerJ. 2024 Jan 5;12:e16704. doi: 10.7717/peerj.16704 (PMC10773451; doi:10.7717/peerj.16704)
Supplement: Supplemental Information 10 — SG, self-grafted; QG, grafted on ‘Qinmi No. 1’; RG, grafted on ‘Ribenxuesong’. [file peerj-12-16704-s010.xlsx]

## Sheet: CmADH1
	The end of the fruit expansion period (30DAP)												The commercial ripening period (42DAP)
	SG-1	SG-2	SG-3		QG-1	QG-2	QG-3		RG-1	RG-2	RG-3		SG-1	SG-2	SG-3		QG-1	QG-2	QG-3		RG-1	RG-2	RG-3
β-actin	19.11	17.16	17.43		17.23	15.85	17.84		18.48	17.74	16.74		16.98	18.73	18.38		16.6	20.62	18.84		19.08	17.01	17.39
	19.14	17.28	17.48		17.84	15.91	18.77		18.48	17.88	16.49		17.41	18.62	18.16		16.97	19.99	18.58		18.34	17.66	17.1
	19.27	17.56	17.09		17.65	15.9	18.32		18.56	17.6	17.27		17.7	18	18.28		17	19.91	18.77		19.37	17.17	16.96
	19.1733	17.3333	17.3333		17.5733	15.8867	18.31		18.5067	17.74	16.8333		17.3633	18.45	18.2733		16.8567	20.1733	18.73		18.93	17.28	17.15
ADH1	20.92	18.64	18.84		18.32	17.15	19.69		19.11	18.31	17.37		18.56	19.08	18.84		17.13	20.84	19.48		18.84	16.96	16.39
	20.96	18.62	18.55		18.53	17.09	19.28		19.42	18.42	17.76		18.2	19.18	18.84		17.3	21.05	19.31		18.07	16.86	16.52
	20.61	18.83	18.94		18.49	17.44	19.9		19.4	18.64	17.82		18.1	18.72	18.74		17.91	20.71	19.42		18.39	16.72	16.64
	20.83	18.6967	18.7767		18.4467	17.2267	19.6233		19.31	18.4567	17.65		18.2867	18.9933	18.8067		17.4467	20.8667	19.4033		18.4333	16.8467	16.5167
	1.65667	1.36333	1.44333		0.873333	1.34	1.31333		0.803333	0.716667	0.816667		0.923333	0.543333	0.533333		0.59	0.693333	0.673333		-0.496667	-0.433333	-0.633333
		1.48778
	0.168889	-0.124444	-0.0444444		-0.614444	-0.147778	-0.174444		-0.684444	-0.771111	-0.671111		-0.564444	-0.944444	-0.954444		-0.897778	-0.794444	-0.814444		-1.98444	-1.92111	-2.12111
	1.12419	0.917357	0.969663		0.653181	0.90264	0.886109		0.622245	0.585966	0.628023		0.676216	0.51963	0.51604		0.536713	0.576565	0.568627		0.25271	0.264051	0.22987
		1.00374				0.813977				0.612078				0.570629				0.560635				0.248877
		0.107545				0.139498				0.0227975				0.0914588				0.0210941				0.01741
SG: self-grafted; QG: grafted on ‘Qinmi No.1’; RG: grafted on ‘Ribenxuesong’.

## Sheet: CmADH2
	The end of the fruit expansion period (30DAP)												The commercial ripening period (42DAP)
	SG-1	SG-2	SG-3		QG-1	QG-2	QG-3		RG-1	RG-2	RG-3		SG-1	SG-2	SG-3		QG-1	QG-2	QG-3		RG-1	RG-2	RG-3
β-actin	19.11	17.16	17.43		17.23	15.85	17.84		18.48	17.74	16.74		16.98	18.73	18.38		16.6	20.62	18.84		19.08	17.01	17.39
	19.14	17.28	17.48		17.84	15.91	18.77		18.48	17.88	16.49		17.41	18.62	18.16		16.97	19.99	18.58		18.34	17.66	17.1
	19.27	17.56	17.09		17.65	15.9	18.32		18.56	17.6	17.27		17.7	18	18.28		17	19.91	18.77		19.37	17.17	16.96
	19.1733	17.3333	17.3333		17.5733	15.8867	18.31		18.5067	17.74	16.8333		17.3633	18.45	18.2733		16.8567	20.1733	18.73		18.93	17.28	17.15
ADH2	20.06	18.32	18.53		19.23	17.86	19.4		18.37	17.61	17.06		16.59	17.62	17.45		16.56	19.4	18.26		17.1	15.56	15.62
	20.58	18.07	18.59		19.35	17.2	19.9		18.03	17.97	17.86		16.73	17.9	17.69		16.23	19.33	18.15		17.42	15.57	15.35
	20.05	18.46	18		19.23	17.25	19.89		18.16	17.32	17.07		16.72	17.44	17.18		16.84	19.74	18.2		17.56	15.73	15.64
	20.23	18.2833	18.3733		19.27	17.4367	19.73		18.1867	17.6333	17.33		16.68	17.6533	17.44		16.5433	19.49	18.2033		17.36	15.62	15.5367
	1.05667	0.95	1.04		1.69667	1.55	1.42		-0.32	-0.106667	0.496667		-0.683333	-0.796667	-0.833333		-0.313333	-0.683333	-0.526667		-1.57	-1.66	-1.61333
		1.01556												-0.771111
	0.0411111	-0.0655556	0.0244444		0.681111	0.534444	0.404444		-1.33556	-1.12222	-0.518889		-1.69889	-1.81222	-1.84889		-1.32889	-1.69889	-1.54222		-2.58556	-2.67556	-2.62889
	1.02891	0.955577	1.01709		1.60337	1.44838	1.32358		0.396239	0.459386	0.697909		0.308023	0.284752	0.277606		0.398075	0.308023	0.343356		0.166598	0.156523	0.161669
		1.00052				1.45845				0.517845				0.290127				0.349818				0.161597
		0.0393707				0.140169				0.159105				0.015905				0.0453722				0.00503809
SG: self-grafted; QG: grafted on ‘Qinmi No.1’; RG: grafted on ‘Ribenxuesong’.

## Sheet: CmAAT1
	The end of the fruit expansion period (30DAP)												The commercial ripening period (42DAP)
	SG-1	SG-2	SG-3		QG-1	QG-2	QG-3		RG-1	RG-2	RG-3		SG-1	SG-2	SG-3		QG-1	QG-2	QG-3		RG-1	RG-2	RG-3
β-actin	19.11	17.16	17.43		17.23	15.85	17.84		18.48	17.74	16.74		16.98	18.73	18.38		16.6	20.62	18.84		19.08	17.01	17.39
	19.14	17.28	17.48		17.84	15.91	18.77		18.48	17.88	16.49		17.41	18.62	18.16		16.97	19.99	18.58		18.34	18.66	17.1
	19.27	17.56	17.09		17.65	15.9	18.32		18.56	17.6	17.27		17.7	18	18.28		18	19.91	18.77		19.37	17.17	16.96
	19.1733	17.3333	17.3333		17.5733	15.8867	18.31		18.5067	17.74	16.8333		17.3633	18.45	18.2733		17.19	20.1733	18.73		18.93	17.6133	17.15
AAT1	18.97	17.47	17.32		17.15	15.47	18.22		17.91	17.46	16.85		18.4	19.44	19.04		18.27	21.33	19.95		19.02	18.31	17.5
	18.82	17.31	17.16		17.59	15.76	18.05		18.15	17.47	16.55		18.57	19.83	19.43		18.12	21.27	19.59		19.91	18.14	17.75
	19.16	17.44	17.3		17.33	15.39	18.16		18.42	17.64	16.43		18.48	19.64	19.64		18.17	21.19	19.91		19.44	18.26	17.83
	18.9833	17.4067	17.26		17.3567	15.54	18.1433		18.16	17.5233	16.61		18.4833	19.6367	19.37		18.1867	21.2633	19.8167		19.4567	18.2367	17.6933
	-0.19	0.0733333	-0.0733333		-0.216667	-0.346667	-0.166667		-0.346667	-0.216667	-0.223333		1.12	1.18667	1.09667		0.996667	1.09	1.08667		0.526667	0.623333	0.543333
		-0.0633333
	-0.126667	0.136667	-0.01		-0.153333	-0.283333	-0.103333		-0.283333	-0.153333	-0.16		1.18333	1.25	1.16		1.06	1.15333	1.15		0.59	0.686667	0.606667
	0.915945	1.09936	0.993092		0.899171	0.82169	0.93088		0.82169	0.899171	0.895025		2.27101	2.37841	2.23457		2.08493	2.22427	2.21914		1.50525	1.60956	1.52274
		1.0028				0.883914				0.871962				2.29467				2.17611				1.54585
		0.0920929				0.0561708				0.0435858				0.0747812				0.0790082				0.0558652
SG: self-grafted; QG: grafted on ‘Qinmi No.1’; RG: grafted on ‘Ribenxuesong’.

## Sheet: CmAAT2
	The end of the fruit expansion period (30DAP)												The commercial ripening period (42DAP)
	SG-1	SG-2	SG-3		QG-1	QG-2	QG-3		RG-1	RG-2	RG-3		SG-1	SG-2	SG-3		QG-1	QG-2	QG-3		RG-1	RG-2	RG-3
β-actin	19.11	17.16	17.43		17.23	15.85	17.84		18.48	17.74	16.74		16.98	18.73	18.38		16.6	20.62	18.84		19.08	17.01	17.39
	19.14	17.28	17.48		17.84	15.91	18.77		18.48	17.88	16.49		17.41	18.62	18.16		16.97	19.99	18.58		18.34	17.66	17.1
	19.27	17.56	17.09		17.65	15.9	18.32		18.56	17.6	17.27		17.7	18	18.28		17	19.91	18.77		19.37	17.17	16.96
	19.1733	17.3333	17.3333		17.5733	15.8867	18.31		18.5067	17.74	16.8333		17.3633	18.45	18.2733		16.8567	20.1733	18.73		18.93	17.28	17.15
AAT2	17.35	15.94	15.48		15.76	14.13	16.96		16.72	16.1	15.3		17.34	18.4	18.28		16.49	19.46	18.1		18.95	16.97	16.31
	17.59	15.86	15.61		16.15	14.21	16.71		16.56	15.73	15.09		17.25	18.37	18.38		16.22	19.57	18.54		18.03	16.63	16.55
	18.19	15.95	16.26		16.08	14.03	16.78		16.85	16.04	15.4		17.44	18.34	18.13		16.91	19.98	18.56		18.12	16.78	16.68
	17.71	15.9167	15.7833		15.9967	14.1233	16.8167		16.71	15.9567	15.2633		17.3433	18.37	18.2633		16.54	19.67	18.4		18.3667	16.7933	16.5133
	-1.46333	-1.41667	-1.55		-1.57667	-1.76333	-1.49333		-1.79667	-1.78333	-1.57		-0.02	-0.08	-0.01		-0.316667	-0.503333	-0.33		-0.563333	-0.486667	-0.636667
		-1.47667
	0.0133333	0.06	-0.0733333		-0.1	-0.286667	-0.0166667		-0.32	-0.306667	-0.0933333		1.45667	1.39667	1.46667		1.16	0.973333	1.14667		0.913333	0.99	0.84
	1.00928	1.04247	0.950439		0.933033	0.819794	0.988514		0.80107	0.808508	0.937354		2.74473	2.63293	2.76383		2.23457	1.96337	2.21402		1.88339	1.98618	1.79005
		1.00073				0.91378				0.848977				2.71383				2.13732				1.88654
		0.0466058				0.0859919				0.0766272				0.0707115				0.150995				0.0981054
SG: self-grafted; QG: grafted on ‘Qinmi No.1’; RG: grafted on ‘Ribenxuesong’.
